# Supplementary material for: Fatal intentional drowning in Australia: A systematic literature review of rates and risk factors
Source: PLoS One. 2020 May 22;15(5):e0231861. doi: 10.1371/journal.pone.0231861 (PMC7244177; doi:10.1371/journal.pone.0231861)
Supplement: S2 File — (XLSX) [file pone.0231861.s002.xlsx]

## Sheet: Data extraction
No	Authors	Year published	Year of study	Data source	Study design	Sample, setting	Scale of study		Manner of intentional drowning cases		Findings
							National	Subnational	Suicide	Homicide	Epidemiology	Drowning incidents classified by gender	Drowning incidents classified by age-group	Drowning incidents classified by location	Drowning incidents classified by history of mental disorders	Risk factors identified	Prevention identified	Publication bias
1	Byard R, Austin AE, Van Den Heuval C	2011	2008	Australian Bureau of Statistics (ABS)	Observational descriptive (epidemiological) study	Suicide deaths recorded by ABS	v		v		45 drownings and submersions (2%) of 2191 suicide deaths recorded during the study period.	Not specific for drowning	Not specific for drowning	No	No	No	No	Selection bias: difficulty in identifying the intent of the incident, i.e. accident or suicide
2	Darke S, Duflou J, Torok M	2009	1997-2006	Medico-legal/autopsy records	Observational descriptive (epidemiological) study	Autopsied completed suicide deaths aged between 15 and 60 years recorded by NSW Department of Forensic Medicine.		v	v		Immersion was the cause of death in 2.9% of 1436 cases identified during the study period	Not specific for drowning	No	Not specific for drowning	No	Alcohol and drugs: suicide drowning cases tested positive for substances 91.7%, illicit drugs 19.4%, alcohol 52.8%, pharmaceuticals 47.2%, cannabis 5.6%, opioids 5.6%, psychostimulants 8.3%. There were notable differences between suicide methods and detected drugs. The presence of substances varied across methods (ꭓ26 = 22.0, p< 0.001), but was almost universal in drowning cases.	No	Selection bias and reporting bias: did not reflect the prevalence of substances amongst cases of nonoverdose suicide
3	Donaldson S, Bi P, Hiller JE	2007	1907-1998	Australian Institute of Health and Welfare (AIHW)	Observational descriptive (epidemiological) and analytical study	Suicide deaths deaths recorded by the AIHW	v		v		Overall suicide mortality rate in Australia declined over the study period, from 15.2/100,000 from the beginning of the 20th century to 13.9/100,000 by the end of the century.	Drowning was the least common suicide method used by male victims. The trend of suicide by drowning in male has been decreasing, from 3/100,000 in 1908 to 1/100,000 in 1998. The most common suicide methods used by males in 1907 were guns, poisoning and hanging, and were changed to hanging, gas and guns in 1998.	Not specific for drowning	No	No	No	No	No bias identified, in relation to the the aim of the review
											Despite the overall decline, the female suicide mortality rates increased over the study period. Male suicide mortality rates were significantly higher than female rates over the study period (P<0.0001).	Drowning was the most commonly used methods by females in early 20th century, with 1.25/100,000 in 1908, but the rate has been decreasing to 0.25/100,000 in 1998. The most common suicide methods used by females in 1907 were drowning, hanging and poisoning, while hanging, gas and drowning and poisoning (equally third of cases) were used by females in 1998.
4	Dyson K, Morgans A, Bray J, Matthews B, Smith K	2013	1999-2011	The Victorian Ambulance Cardiac Arrest Registry (VACAR)	Observational descriptive (epidemiological) and analytical study	All cases of out-of-hospital cardiac arrests due to drowning in the State of Victoria recorded by VACAR		v	v		Suicide is the cause of drowning in 0.9% (n= 3) of 336 recorded drowning cases during the study period.	Not specific for intentional drowning	Not specific for intentional drowning	Not specific for intentional drowning	No	No	No	No bias identified, in relation to the the aim of the review
5	Koo YW, Kõlves K, De Leo D	2017	2000–2012	The Queensland Suicide Register (QSR)	Observational descriptive (epidemiological) and analytical study	All suicide cases classified as Beyond Reasonable Doubt or Probable (based on the Suicide Classification Flow Chart developed by the Australian Institute for Suicide Research and Prevention) in Queensland, as documented by QSR		v	v		The average annual rates were 13.71 per 100,000 for persons aged 65–74 (young-old), 16.51 per 100,000 for persons aged 75–84 (middle-old), and 19.26 per 100,000 for persons aged 85+ years (oldest old).	Not specific for drowning	65-74 years: 22 cases (4.5%); 75-84 years: 24 cases (6.8%); 85+ years: 10 cases (9.9%). Drowning significantly increased with age (χ2 trend= 5.95, df= 1, p= 0.02).	No	Not specific for drowning	Drowning significantly increased with age (χ2 trend= 5.95, df= 1, p= 0.02). 85+ years versus 75-84 years: OR 1.31 (95% CI: 0.61–2.83).	No	Selection bias and reporting bias: (1) the number of suicides in older olds was relatively small, especially in females; (2) reliance on external sources such as police/coronial information along with the conjectures of the next of kin, thus may impede on the quality of the investigating process; (3) some relevant information related to the person’s death can go unrecorded if not systematically i…
											Drowning was the least used method in all age groups (young-old, middle-old, and oldest-old) with 56 cases of a total of 978 suicides identified during the study period. In young-olds, the most frequent method employed was firearms, explosives and, hanging. Hanging was the most commonly used method for middle-old and oldest-old, followed by suffocation by plastic bag in oldest-olds.		65-74 years versus 75-84 years: OR 0.65 (95% CI: 0.36–1.17). 85+ years versus 75-84 years: OR 1.31 (95% CI: 0.61–2.83).
6	Milner A, Witt K, Maheen H, LaMontagne A	2017	2001-2012	ABS, the National Coroners Information System (NCIS)	Observational descriptive (epidemiological) and analytical study	All suicide deaths recorded in NCIS and ABS	v		v		Drowning is the least used method of suicide for males and the third least used method for females (after poisons and driving/hit by vehicle). Hanging was the most prevalent method for the majority of suicides.	Not specific for drowning	Not specific for drowning	No	No	Persons in occupations with access to firearms, medicines or drugs, and carbon monoxide more frequently used these methods to end their lives than those without access to means. However, most drowning victims had occupations without access to lethal means of suicide.	No	No bias identified, in relation to the the aim of the review
7	Pirkis J, Burgess P, Blood RW, Francis C	2007	2000-2001	News reports, ABS	Observational descriptive (epidemiological) study	Suicidal behaviour reported from 515 sources of news	v		v		Of 2,341 suicides occurred in Australia during the study period, only 19 (1%) of which were reported in the news. There was a tendency for over-reporting of suicides by drowning, with 6% of all news report in comparison to 2% of all suicides recorded by ABS, underlining the news-worthiness of different suicide methods.	Not specific for drowning	Not specific for drowning	No	No	No	No	Selection bias: (1) Media sources used were not exhaustive; (2) the study did not appraise the quality of sources; (3) the analyses were limited by the small proportion of suicides and byt the fact that the data on actual suicides were de-identified.
8	Robinson J, Too LS, Pirkis J, Spittal MJ	2016	2010-2012	NCIS	Observational descriptive (epidemiological) and analytical study	Suicide deaths recorded by NCIS	v		v		Drowning is the least used method of suicide (2.73%) of all cases.	Not specific for drowning	Of all 940 youth suicides (aged 24 years or less) and 5939 adult suicides (≥25 years old) included in this study, there were 6 youth drowning suicides and 113 adult drowning suicides.	No	No	No	No	No bias identified, in relation to the the aim of the review
											Among adult suicides, cluster suicides were more likely to involve drowning (2.2% cluster cases versus 1.9% non-cluster cases) and jumping (12.4% cluster cases versus 4.2% non-cluster cases).
9	Sveticic J, Too LS, De Leo D	2012	1994-2007	QSR, NCIS	Observational descriptive (epidemiological) and analytical study	Suicide deaths by Queensland residents identified through NCIS		v	v		Of all 7739 suicide deaths in Queensland duirng the study period, 194 cases (2.5%) were reported to police as missing persons prior to death.	Not specific for drowning	No	Not specific for drowning	No	No	No	Sampling bias and selection bias: the knowledge of how many people go missing with the intention to complete suicide remains very limited, due to inconsistencies in classification of missing persons, insufficient interagency communication and lack of rigorous research
											Most common suicide method used in both missing and non-missing groups was hanging. Drowning was used significantly more frequently in suicides by missing persons than in non-missing victims, (8.2% vs 1.8%; ꭓ2= 39.53, df=1, p<0.01).
10	Walter SJ, Bugeja L, Spittal MJ, Studdert DM	2012	2000-2007	NCIS	Observational descriptive (epidemiological) and analytical study	Deaths due to the external cases documented by NCIS, except those from the ACT and Western Australia, with discretionary or mandatory inquests.	v		Note: did not report the proportion/ number of drowning cases being sent for discretionary inquest as intentional, unintentional, or undetermined drowning deaths		Among 20,379 deaths due to external causes, 1252 (6.1%) proceeded to inquest. Of these inquests, 490 (39.1%) were mandatory and 696 (55.6%) were discretionary.	Not specific for drowning	Not specific for drowning	No	No	No	No	Sampling bias and reporting bias: (1) data from several years for two states were excluded; (2) he covariates available for analysis were limited and are best interpreted as markers for considerations that drive coroners’ decision-making about selecting cases for inquest (iIdeally, this type of analysis would directly test characteristics such as preventability and aberrance, but these concepts a…
											Deaths that were the result of drowning, choking or suffocation (OR 5.12, 95% CI: 3.56 – 7.39), , along with complications during medical care (OR 12.83, 95% CI: 8.65 – 19.04) and transport accidents (OR 2.41, 95% CI: 1.75 – 3.33), had much higher odds for discretionary inquest, underlining the complicated process of determining the manner of death in drowning cases.
											However, odds for cases to be sent for discretionary inquest was the lowest for suicides (OR 0.44, 95% CI 0.30–0.65).
